# Supplementary material for: Effects of a Novel High-Quality Protein Infant Formula on Energetic Efficiency and Tolerance: A Randomized Trial
Source: PubMed Central journal article supplement — J Pediatr Gastroenterol Nutr. 2022 Jun 6;75(4):521–8. doi: 10.1097/MPG.0000000000003490 (PMC9470040; doi:10.1097/mpg.0000000000003490), 2022-06-06
Supplement: mpg-75-521-s001.pdf [file mpg-75-521-s001.pdf]

Supplemental Table 1: Macronutrient composition of SF and CF

| <b>Ingredient</b>              | <b>Study Formula</b> | <b>Control Formula</b> |
|--------------------------------|----------------------|------------------------|
| Energy (kcal/oz)               | 20                   | 20                     |
| Protein (g/100kcal)            | 2.0                  | 2.0                    |
| Whey:casein ratio              | 80:20                | 60:40                  |
| Partially hydrolyzed proteins? | Yes                  | No                     |
| Intact proteins?               | Yes                  | Yes                    |
| Fat (g/100kcal)                | 5.6                  | 5.3                    |
| Carbohydrate (g/100kcal)       | 10                   | 11.3                   |
| Prebiotic (g/L)                | 4 GOS                | 2 GOS 2 PDX            |

Supplemental Table 2. Participant Characteristics by Feeding Group in the ITT population

|                                               | <b>Study Formula</b><br>(n=106) | <b>Commercial Formula</b><br>(n=105) | <b>Human Milk</b><br>(n=100) |
|-----------------------------------------------|---------------------------------|--------------------------------------|------------------------------|
| <b>Sex</b>                                    |                                 |                                      |                              |
| Male                                          | 52 (49)                         | 51 (49)                              | 45 (45)                      |
| Female                                        | 54 (51)                         | 54 (51)                              | 55 (55)                      |
| <b>Race</b>                                   |                                 |                                      |                              |
| White                                         | 77 (73)                         | 77 (73)                              | 87 (87)                      |
| Black                                         | 25 (24)                         | 24 (23)                              | 8 (8)                        |
| Asian                                         | 0                               | 0                                    | 1 (1)                        |
| More than one race                            | 4 (4)                           | 4 (4)                                | 4 (4)                        |
| <b>Ethnicity</b>                              |                                 |                                      |                              |
| Hispanic or Latino                            | 17 (16)                         | 15 (14)                              | 20 (20)                      |
| Non-Hispanic                                  | 89 (84)                         | 90 (86)                              | 80 (80)                      |
| Age at enrollment, days                       | 9 (2, 14)                       | 8 (2, 14)                            | 12 (2, 14)                   |
| Weight at enrollment, g                       | 3325 (2590, 4317)               | 3348 (2665, 4540)                    | 3505 (2673, 4535)            |
| Length at enrollment, cm                      | 50 (47, 54)                     | 50 (47, 54)                          | 51 (47, 55)                  |
| Head Circumference at enrollment, cm          | 35 (33, 37)                     | 35 (33, 37)                          | 36 (33, 38)                  |
| Birth weight, g                               | 3343 (2608, 4281)               | 3265 (2581, 4340)                    | 3430 (2650, 4609)            |
| Birth length, cm                              | 51 (46, 55)                     | 51 (46, 56)                          | 51 (46, 56)                  |
| <b>Gestational age at birth, weeks</b>        |                                 |                                      |                              |
| 37                                            | 14 (13)                         | 11 (10)                              | 5 (5)                        |
| 38                                            | 16 (15)                         | 22 (21)                              | 23 (23)                      |
| 39                                            | 59 (56)                         | 50 (48)                              | 55 (55)                      |
| 40                                            | 17 (16)                         | 20 (19)                              | 15 (15)                      |
| 41                                            | 0                               | 2 (2)                                | 2 (2)                        |
| <b>Birth mode</b>                             |                                 |                                      |                              |
| Vaginal                                       | 75 (71)                         | 72 (69)                              | 77 (77)                      |
| Caesarean section                             | 31 (29)                         | 33 (31)                              | 23 (23)                      |
| Maternal age at enrollment, years             | 28 (18, 39)                     | 27 (15, 41)                          | 29 (20, 41)                  |
| Maternal pre-pregnancy BMI, kg/m <sup>2</sup> | 27 (16, 55)                     | 29 (17, 64)                          | 24 (18, 46)                  |
| <b>Highest maternal education level</b>       |                                 |                                      |                              |
| Primary school                                | 5 (5)                           | 10 (10)                              | 3 (3)                        |
| High school/technical school                  | 61 (58)                         | 56 (53)                              | 31 (31)                      |

|                                          |           |           |            |
|------------------------------------------|-----------|-----------|------------|
| College degree or higher                 | 40 (38)   | 39 (37)   | 66 (66)    |
| <b>Maternal household income</b>         |           |           |            |
| <\$50,000                                | 50 (47)   | 44 (42)   | 34 (34)    |
| \$50,000 - \$75,000                      | 29 (27)   | 30 (29)   | 24 (24)    |
| \$75,000 - \$100,000                     | 15 (14)   | 17 (16)   | 16 (16)    |
| ≥\$100,000                               | 12 (11)   | 14 (13)   | 34 (34)    |
| <b>Maternal smoking during pregnancy</b> |           |           |            |
| Human milk intake prior to study         | 36 (34)   | 33 (31)   | 100 (100)  |
| Human milk intake prior to study, days   | 4 (1, 14) | 3 (1, 14) | 12 (2, 14) |

Categorical variables summarized by frequency (percent) and continuous variables by median (minimum, maximum)

Supplemental Table 3. Participant Characteristics by Feeding Group in the PP population

|                                               | <b>Study Formula</b><br>(n=61) | <b>Commercial Formula</b><br>(n=67) | <b>Human Milk</b><br>(n=57) |
|-----------------------------------------------|--------------------------------|-------------------------------------|-----------------------------|
| <b>Sex</b>                                    |                                |                                     |                             |
| Male                                          | 26 (43)                        | 32 (48)                             | 29 (51)                     |
| Female                                        | 35 (57)                        | 35 (52)                             | 28 (49)                     |
| <b>Race</b>                                   |                                |                                     |                             |
| White                                         | 48 (79)                        | 53 (79)                             | 51 (89)                     |
| Black                                         | 9 (15)                         | 11 (16)                             | 3 (5)                       |
| Asian                                         | 0                              | 0                                   | 1 (2)                       |
| More than one race                            | 4 (7)                          | 3 (4)                               | 2 (4)                       |
| <b>Ethnicity</b>                              |                                |                                     |                             |
| Hispanic or Latino                            | 52 (85)                        | 58 (87)                             | 50 (88)                     |
| Non-Hispanic                                  | 9 (15)                         | 9 (13)                              | 7 (12)                      |
| Age at enrollment, days                       | 9 (3, 14)                      | 10 (2, 14)                          | 12 (2, 14)                  |
| Weight at enrollment, g                       | 3365 (2590, 4317)              | 3402 (2665, 4540)                   | 3580 (3025, 4535)           |
| Length at enrollment, cm                      | 50 (47, 54)                    | 50 (47, 54)                         | 51 (48, 55)                 |
| Head Circumference at enrollment, cm          | 36 (33, 37)                    | 35 (33, 37)                         | 36 (34, 38)                 |
| Birth weight, g                               | 3330 (2720, 4167)              | 3265 (2722, 4340)                   | 3458 (2760, 4609)           |
| Birth length, cm                              | 51 (47, 55)                    | 51 (46, 56)                         | 51 (46, 56)                 |
| <b>Gestational age at birth, weeks</b>        |                                |                                     |                             |
| 37                                            | 5 (8)                          | 8 (12)                              | 4 (7)                       |
| 38                                            | 12 (20)                        | 12 (18)                             | 13 (23)                     |
| 39                                            | 36 (59)                        | 31 (46)                             | 32 (56)                     |
| 40                                            | 8 (13)                         | 14 (21)                             | 6 (11)                      |
| 41                                            | 0                              | 2 (3)                               | 2 (4)                       |
| <b>Birth mode</b>                             |                                |                                     |                             |
| Vaginal                                       | 48 (79)                        | 46 (69)                             | 45 (79)                     |
| Caesarean section                             | 13 (21)                        | 21 (31)                             | 12 (21)                     |
| Maternal age at enrollment, years             | 28 (18, 39)                    | 28 (15, 41)                         | 30 (20, 41)                 |
| Maternal pre-pregnancy BMI, kg/m <sup>2</sup> | 29 (18, 55)                    | 28 (18, 64)                         | 24 (18, 44)                 |
| <b>Highest maternal education level</b>       |                                |                                     |                             |
| Primary school                                | 2 (3)                          | 6 (9)                               | 1 (2)                       |
| High school/technical school                  | 31 (51)                        | 30 (45)                             | 16 (28)                     |
| College degree or higher                      | 28 (46)                        | 31 (46)                             | 40 (70)                     |
| <b>Maternal household income</b>              |                                |                                     |                             |
| <\$50,000                                     | 29 (48)                        | 27 (40)                             | 14 (25)                     |

|                                        |           |           |            |
|----------------------------------------|-----------|-----------|------------|
| \$50,000 - \$75,000                    | 17 (28)   | 16 (24)   | 15 (26)    |
| \$75,000 - \$100,000                   | 8 (13)    | 14 (21)   | 9 (16)     |
| ≥\$100,000                             | 7 (12)    | 10 (15)   | 19 (33)    |
| Maternal smoking during pregnancy      | 8 (13)    | 6 (9)     | 3 (5)      |
| Human milk intake prior to study       | 22 (36)   | 21 (31)   | 57 (100)   |
| Human milk intake prior to study, days | 4 (1, 12) | 2 (1, 14) | 12 (2, 14) |

Categorical variables summarized by frequency (percent) and continuous variables by median (minimum, maximum)

**A****Model-based mean:  
Weight-for-age Z-score**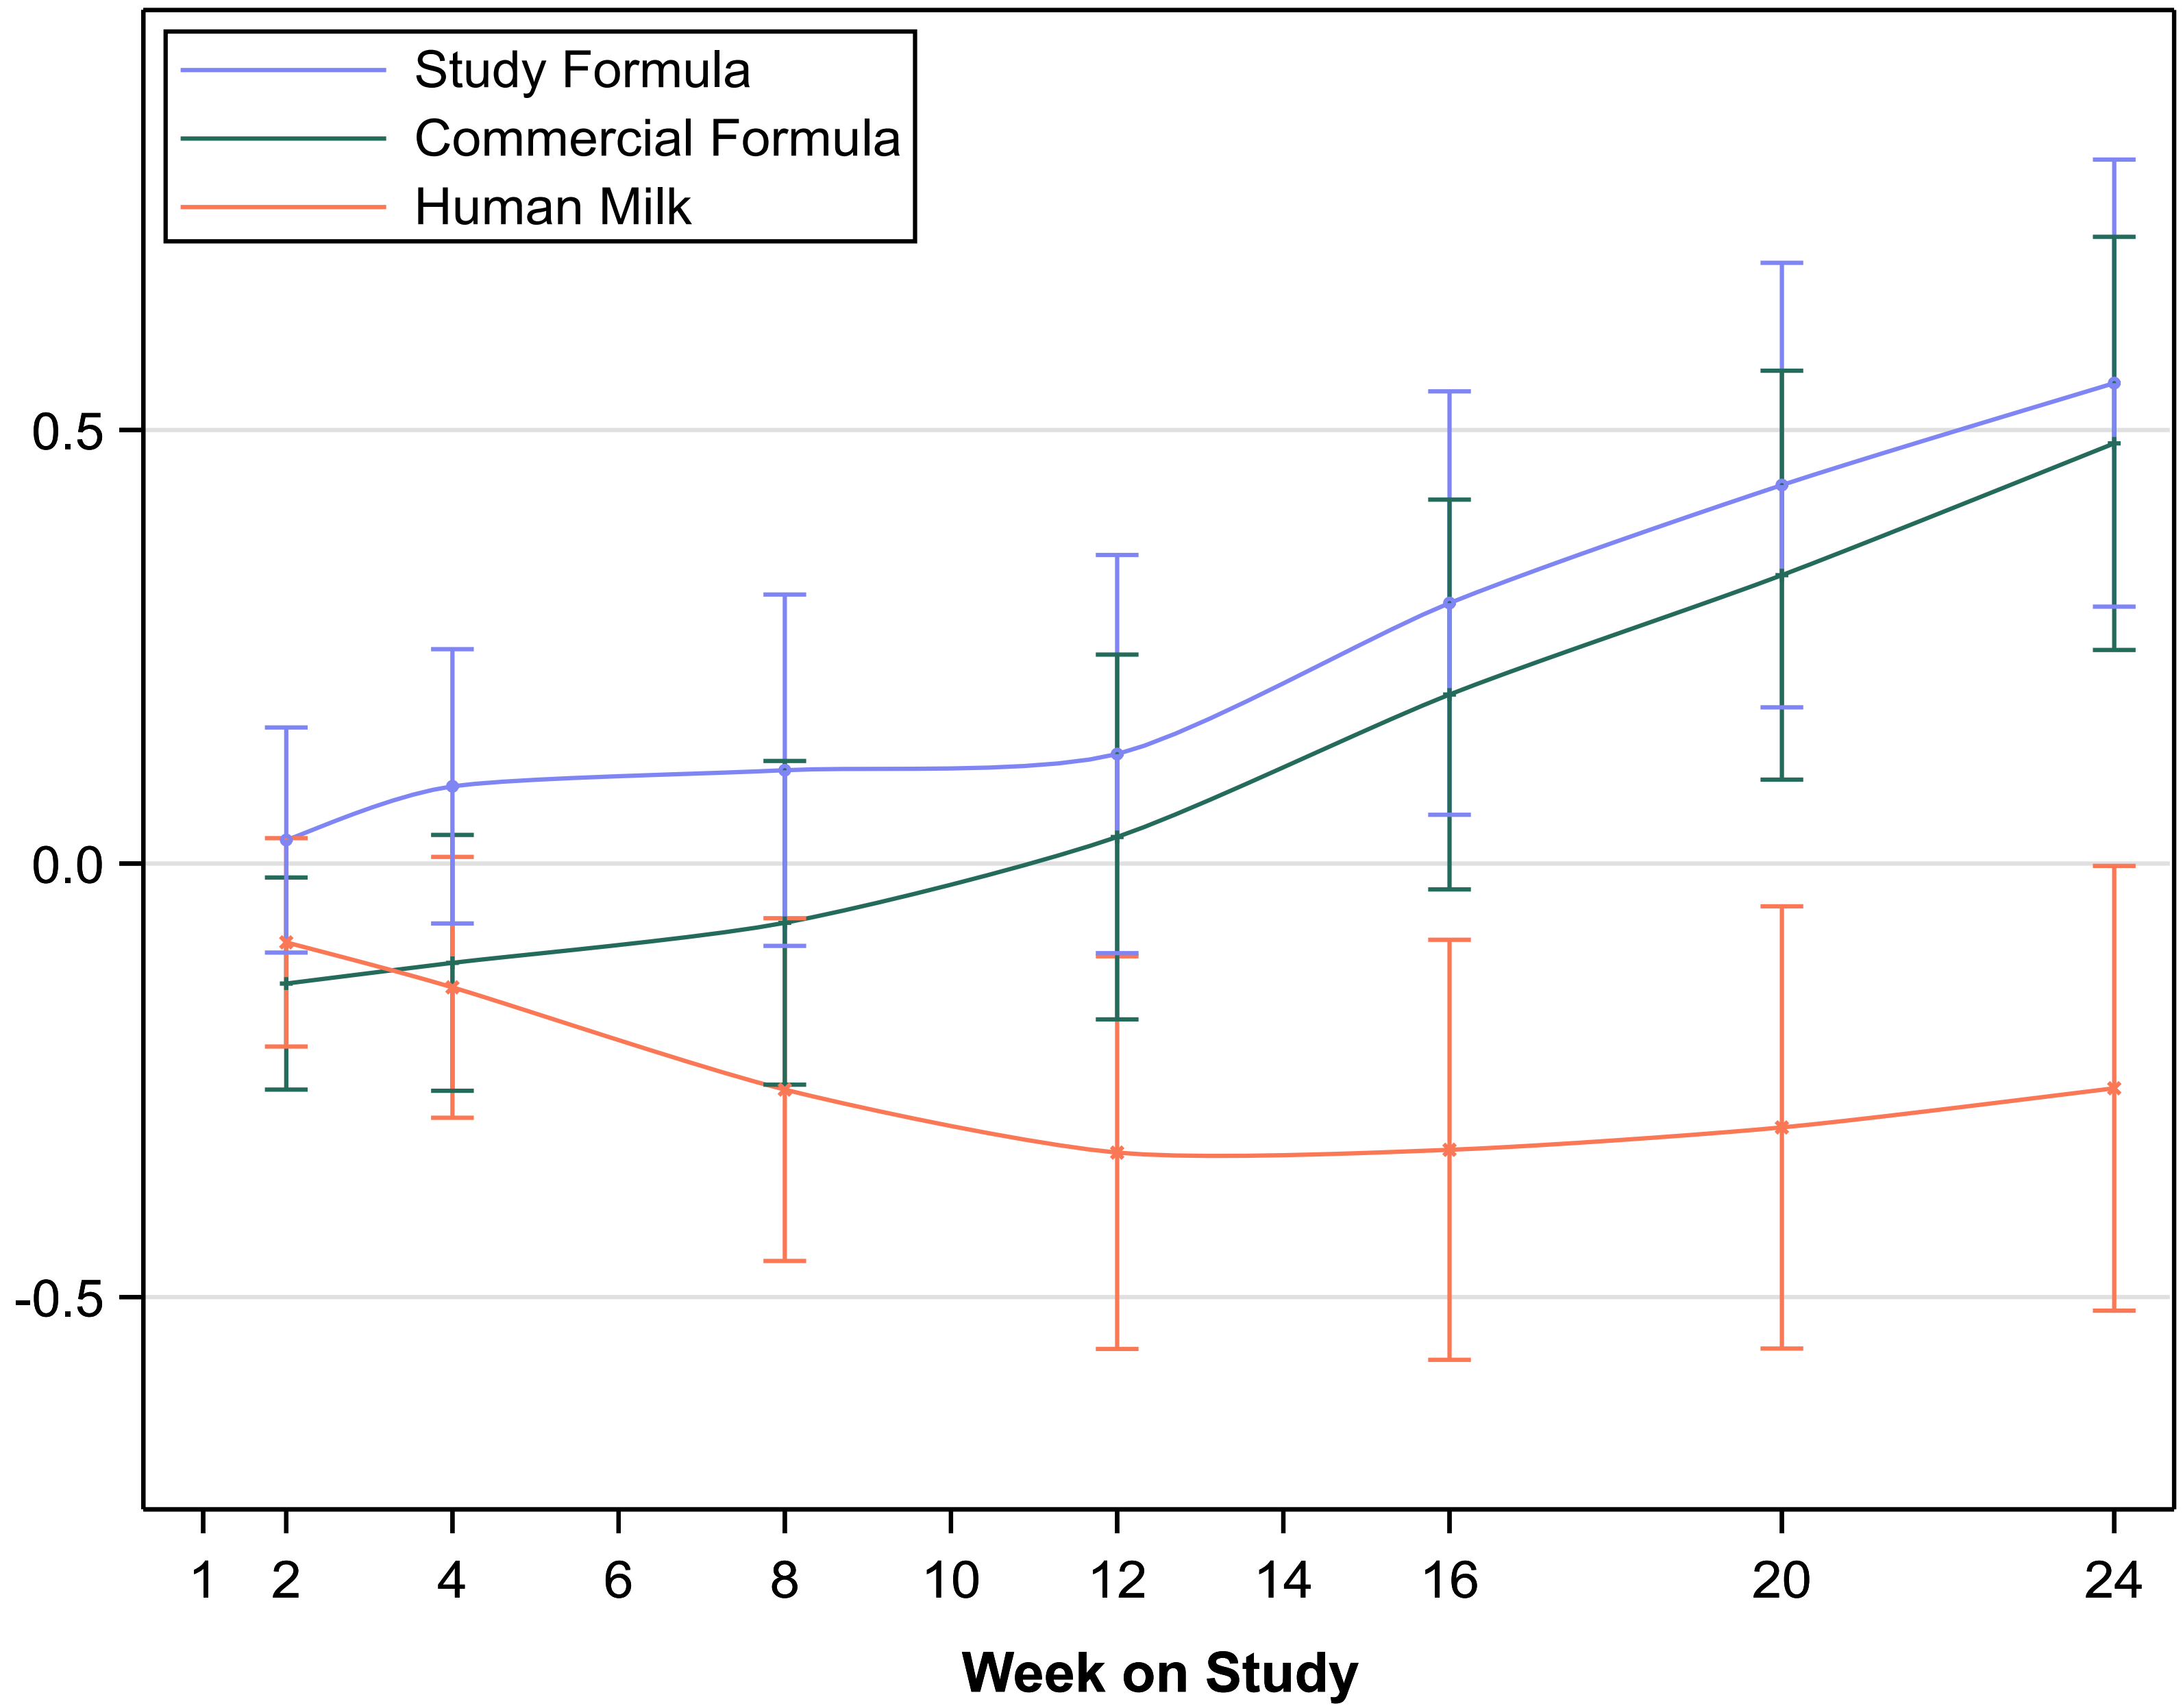

**B****Model-based mean:  
Length-for-age Z-score**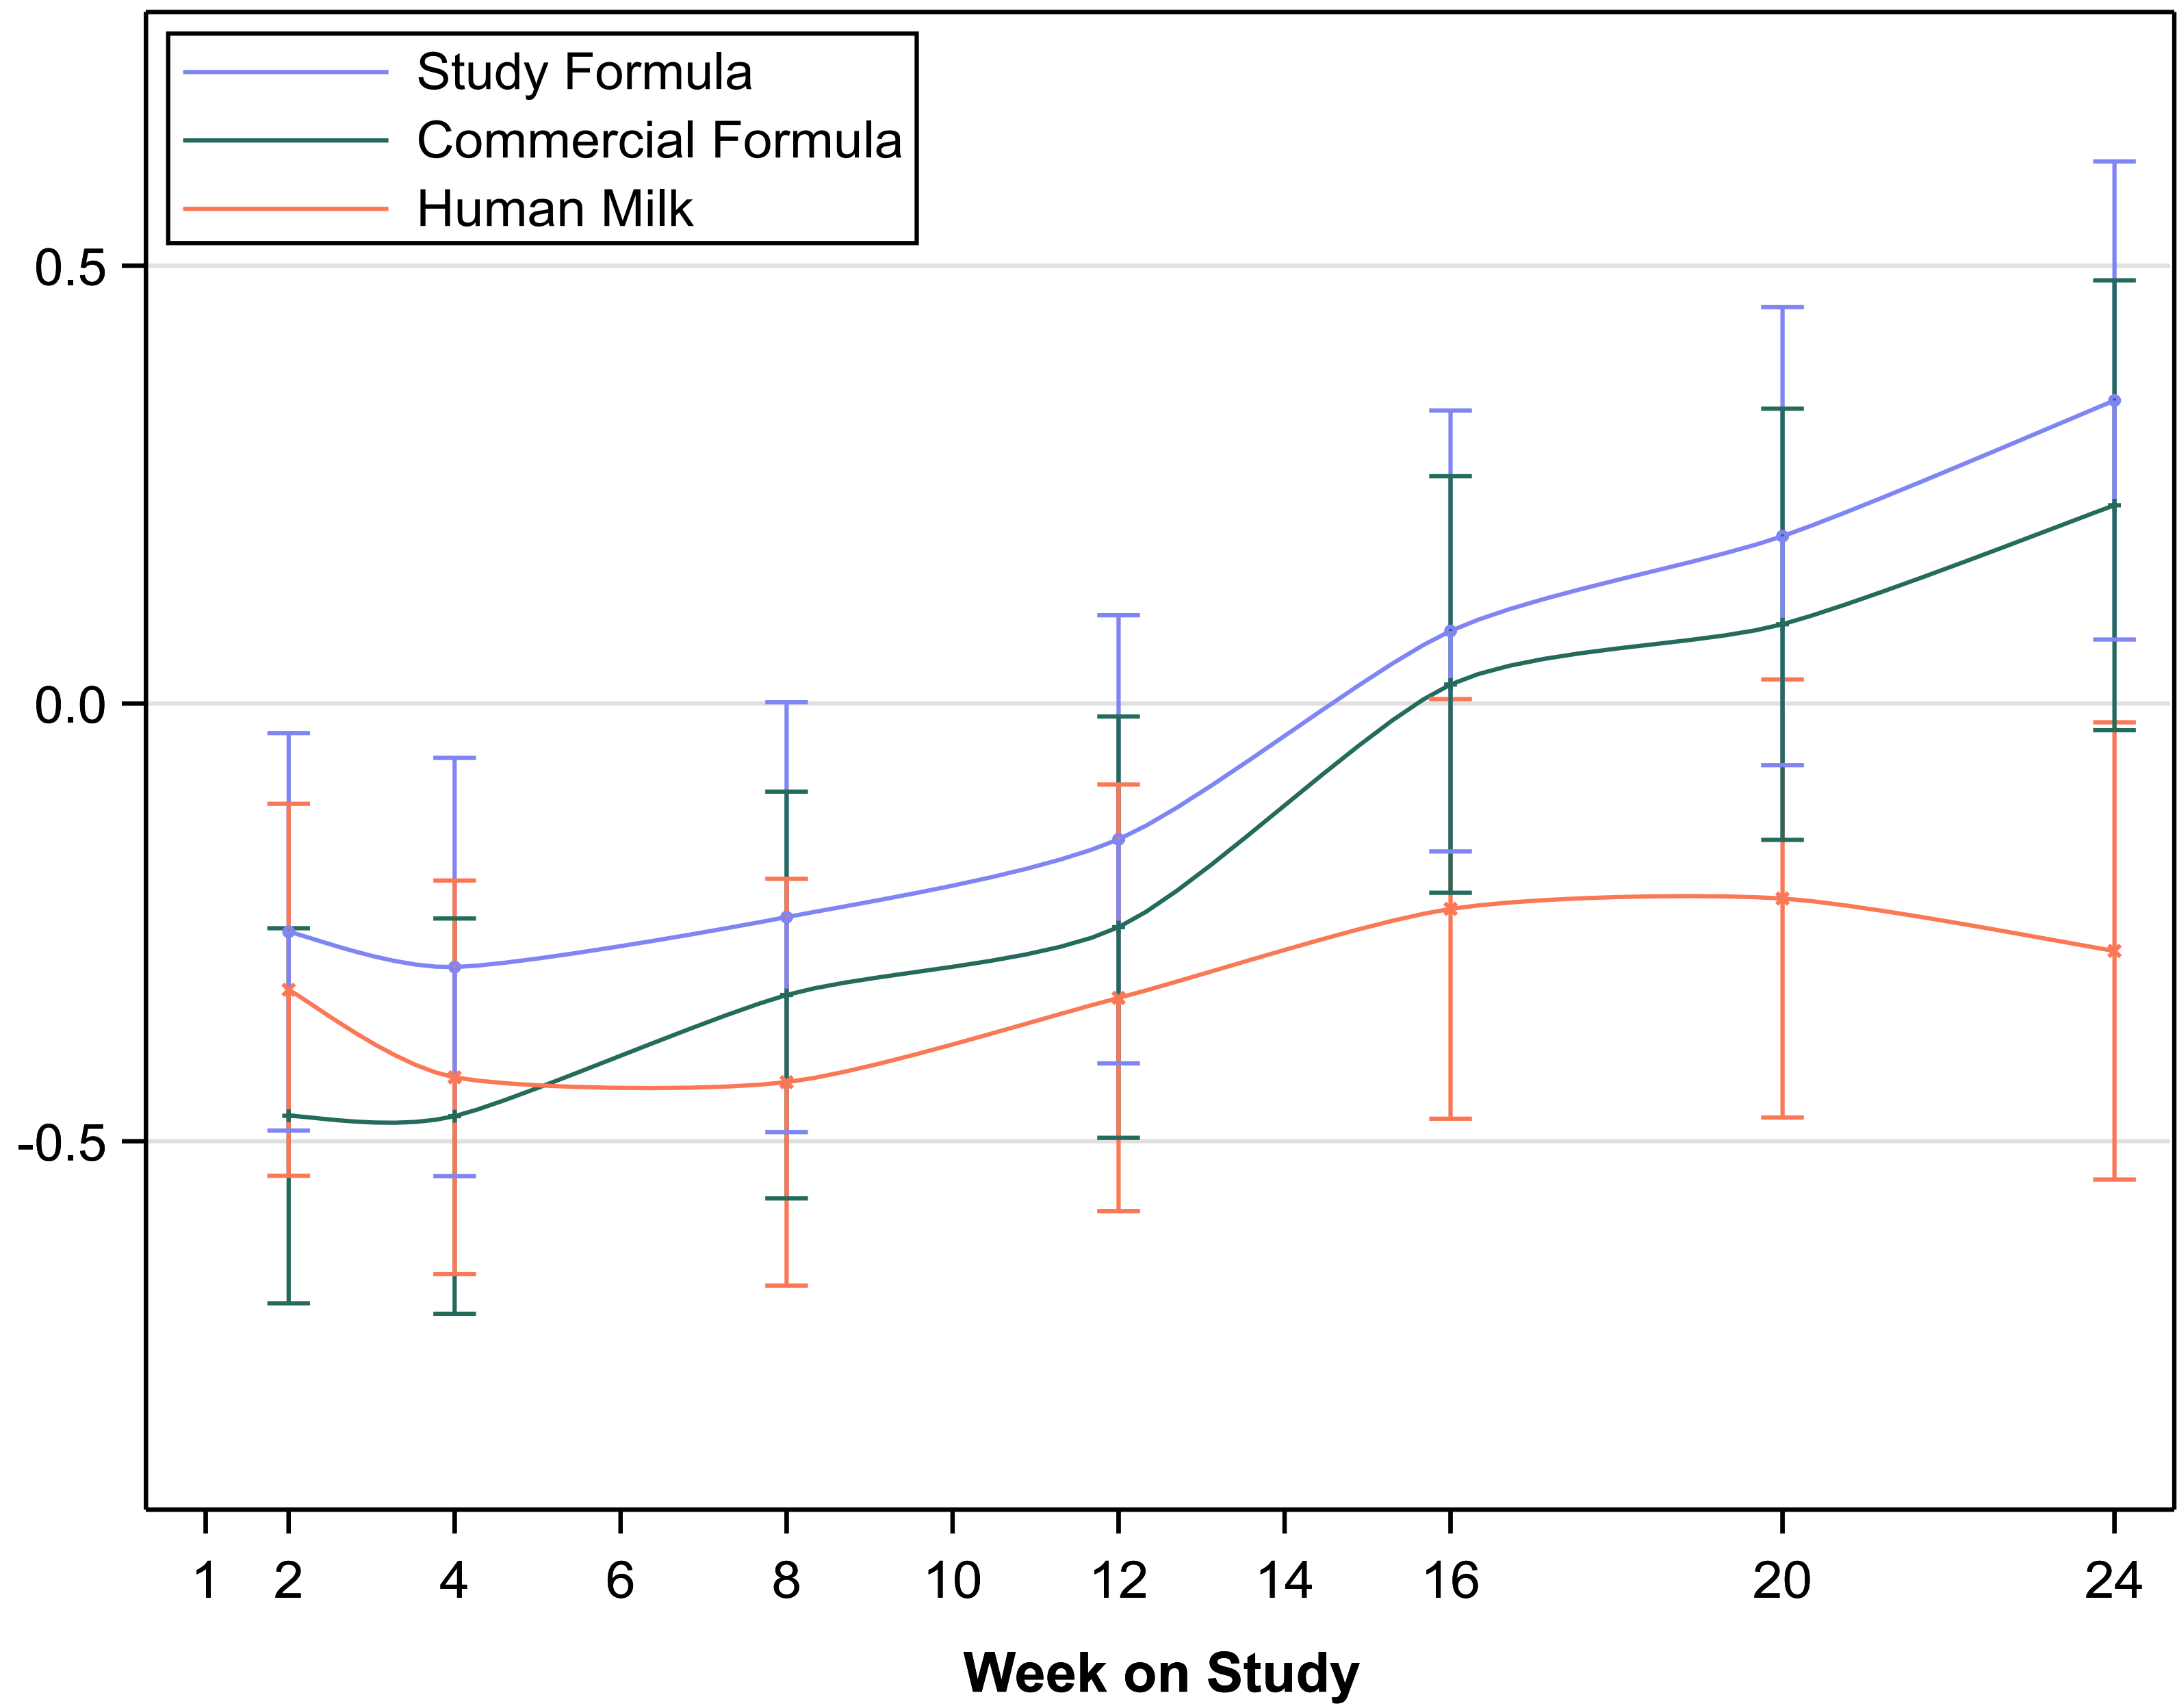

**C****Model-based mean:  
Head circum-for-age Z-score**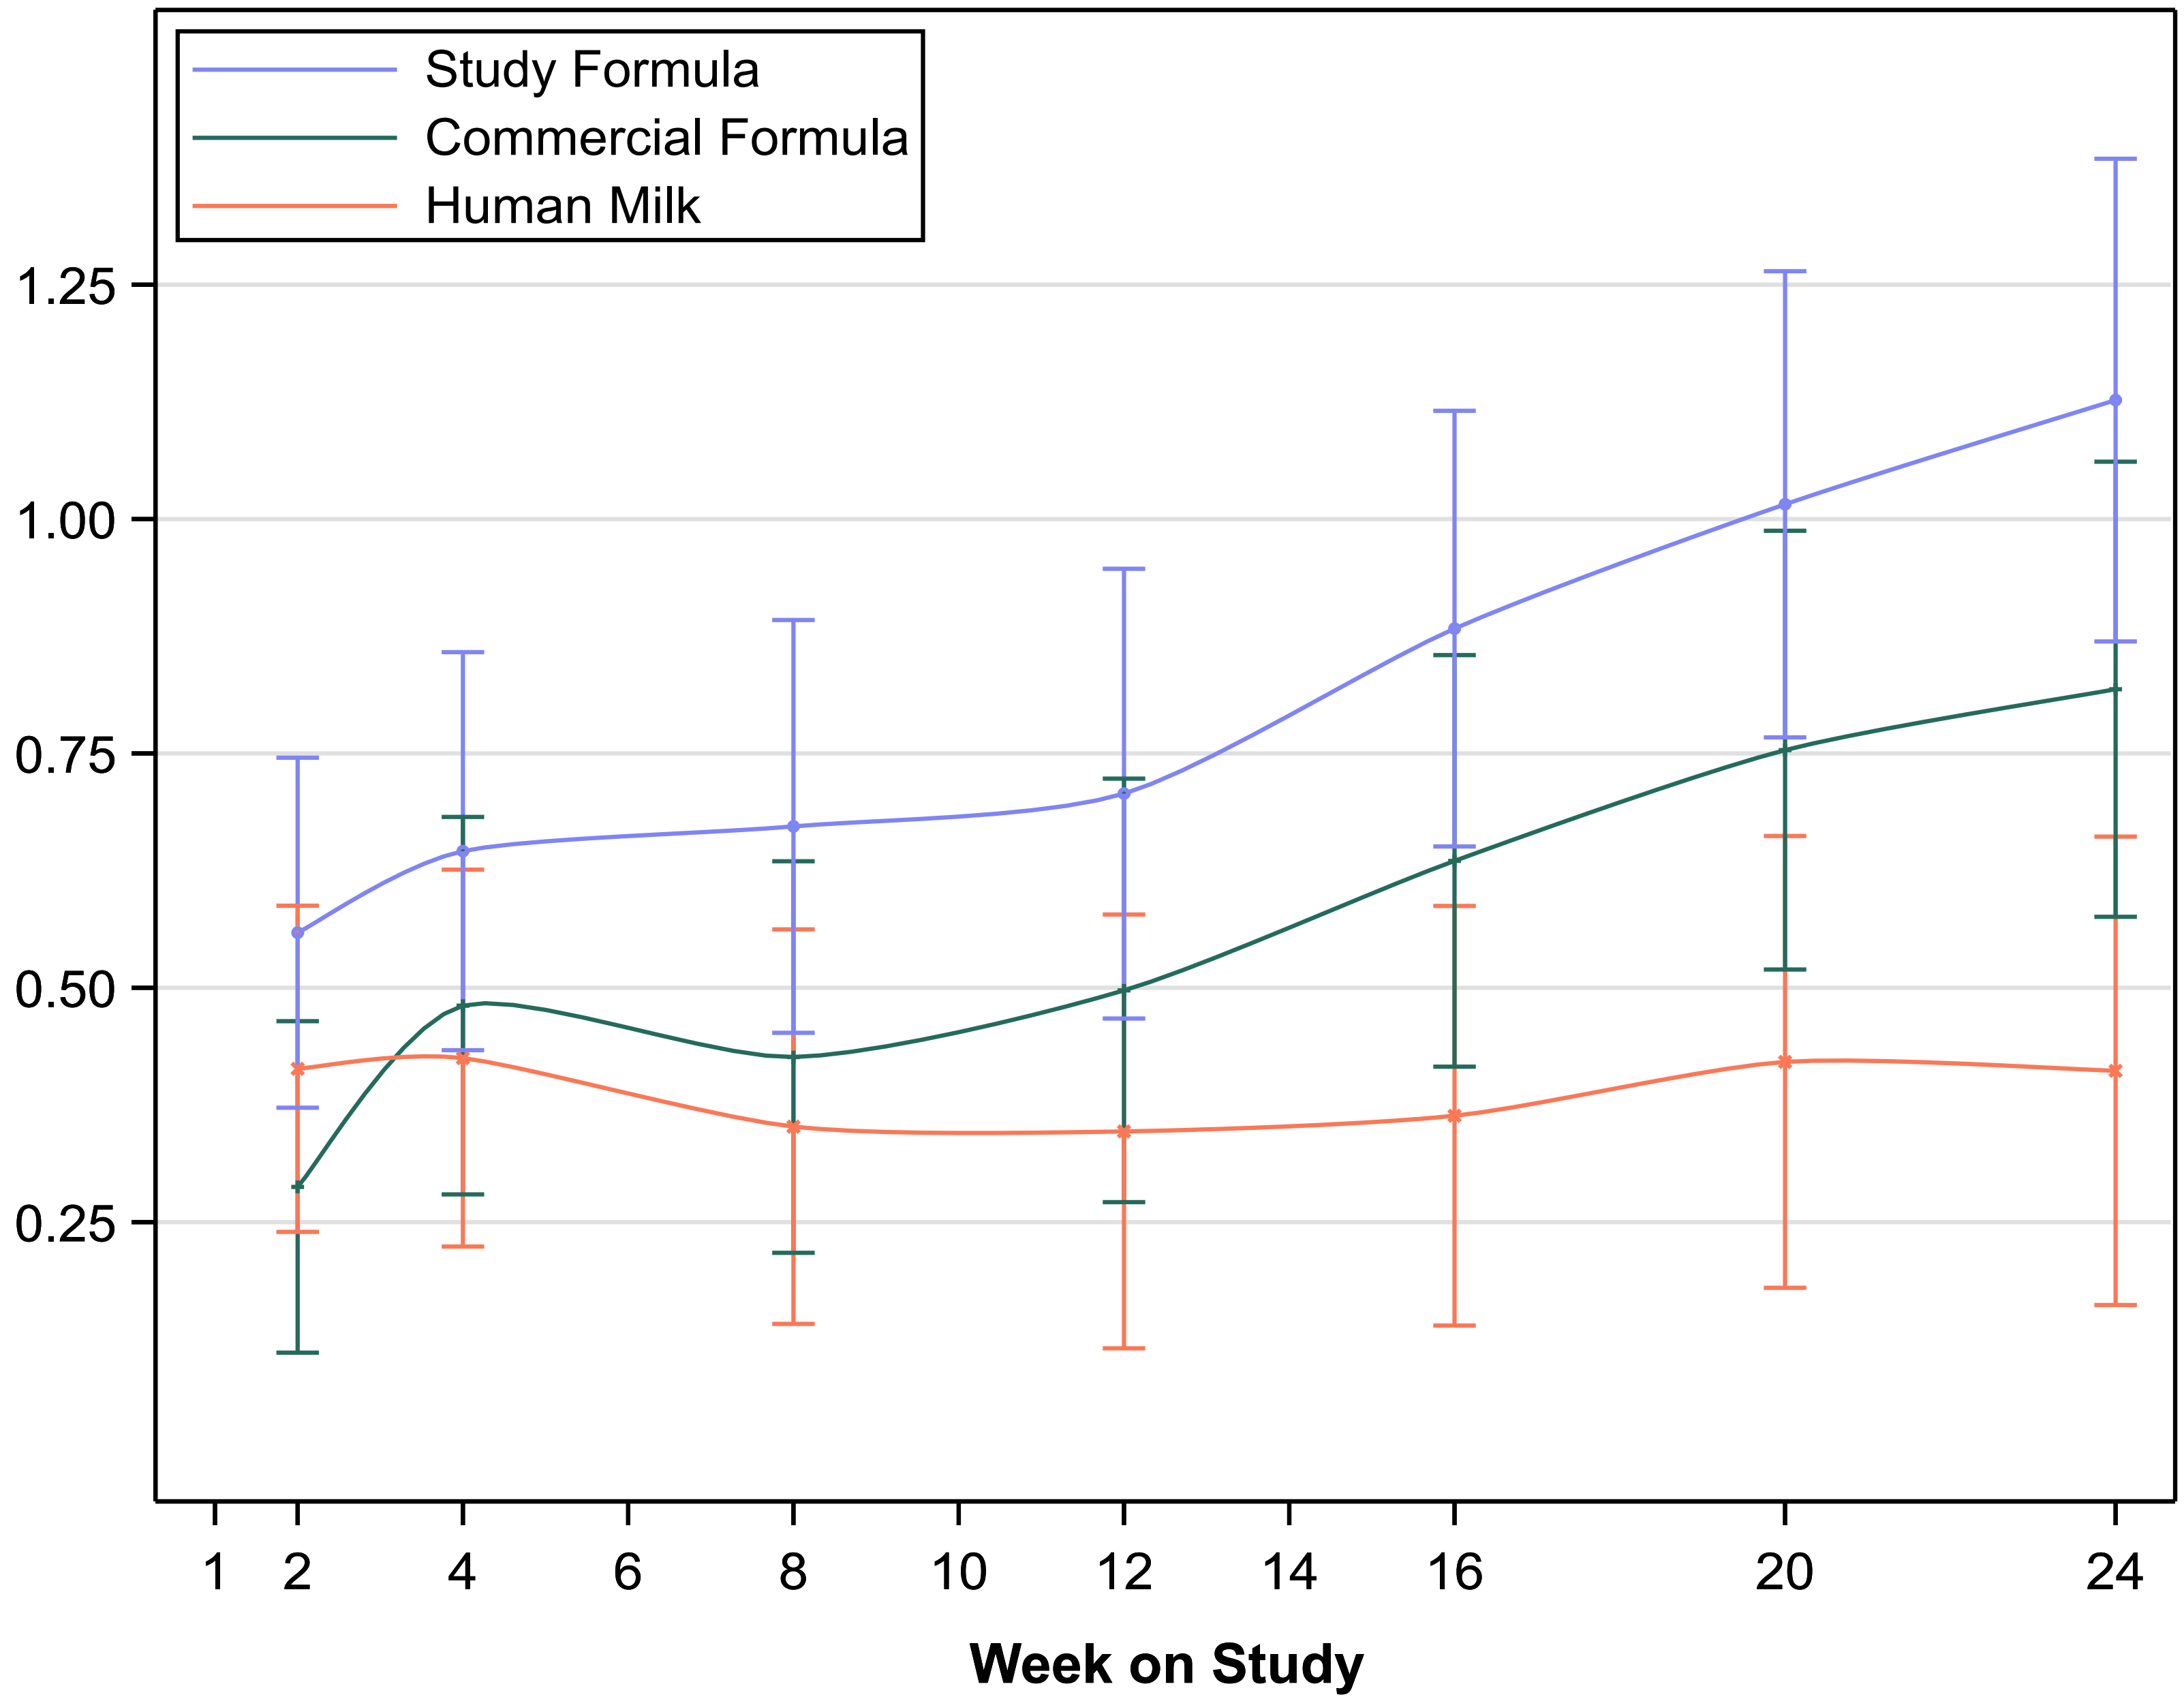



**D****Model-based mean:  
Weight-for-length Z-score**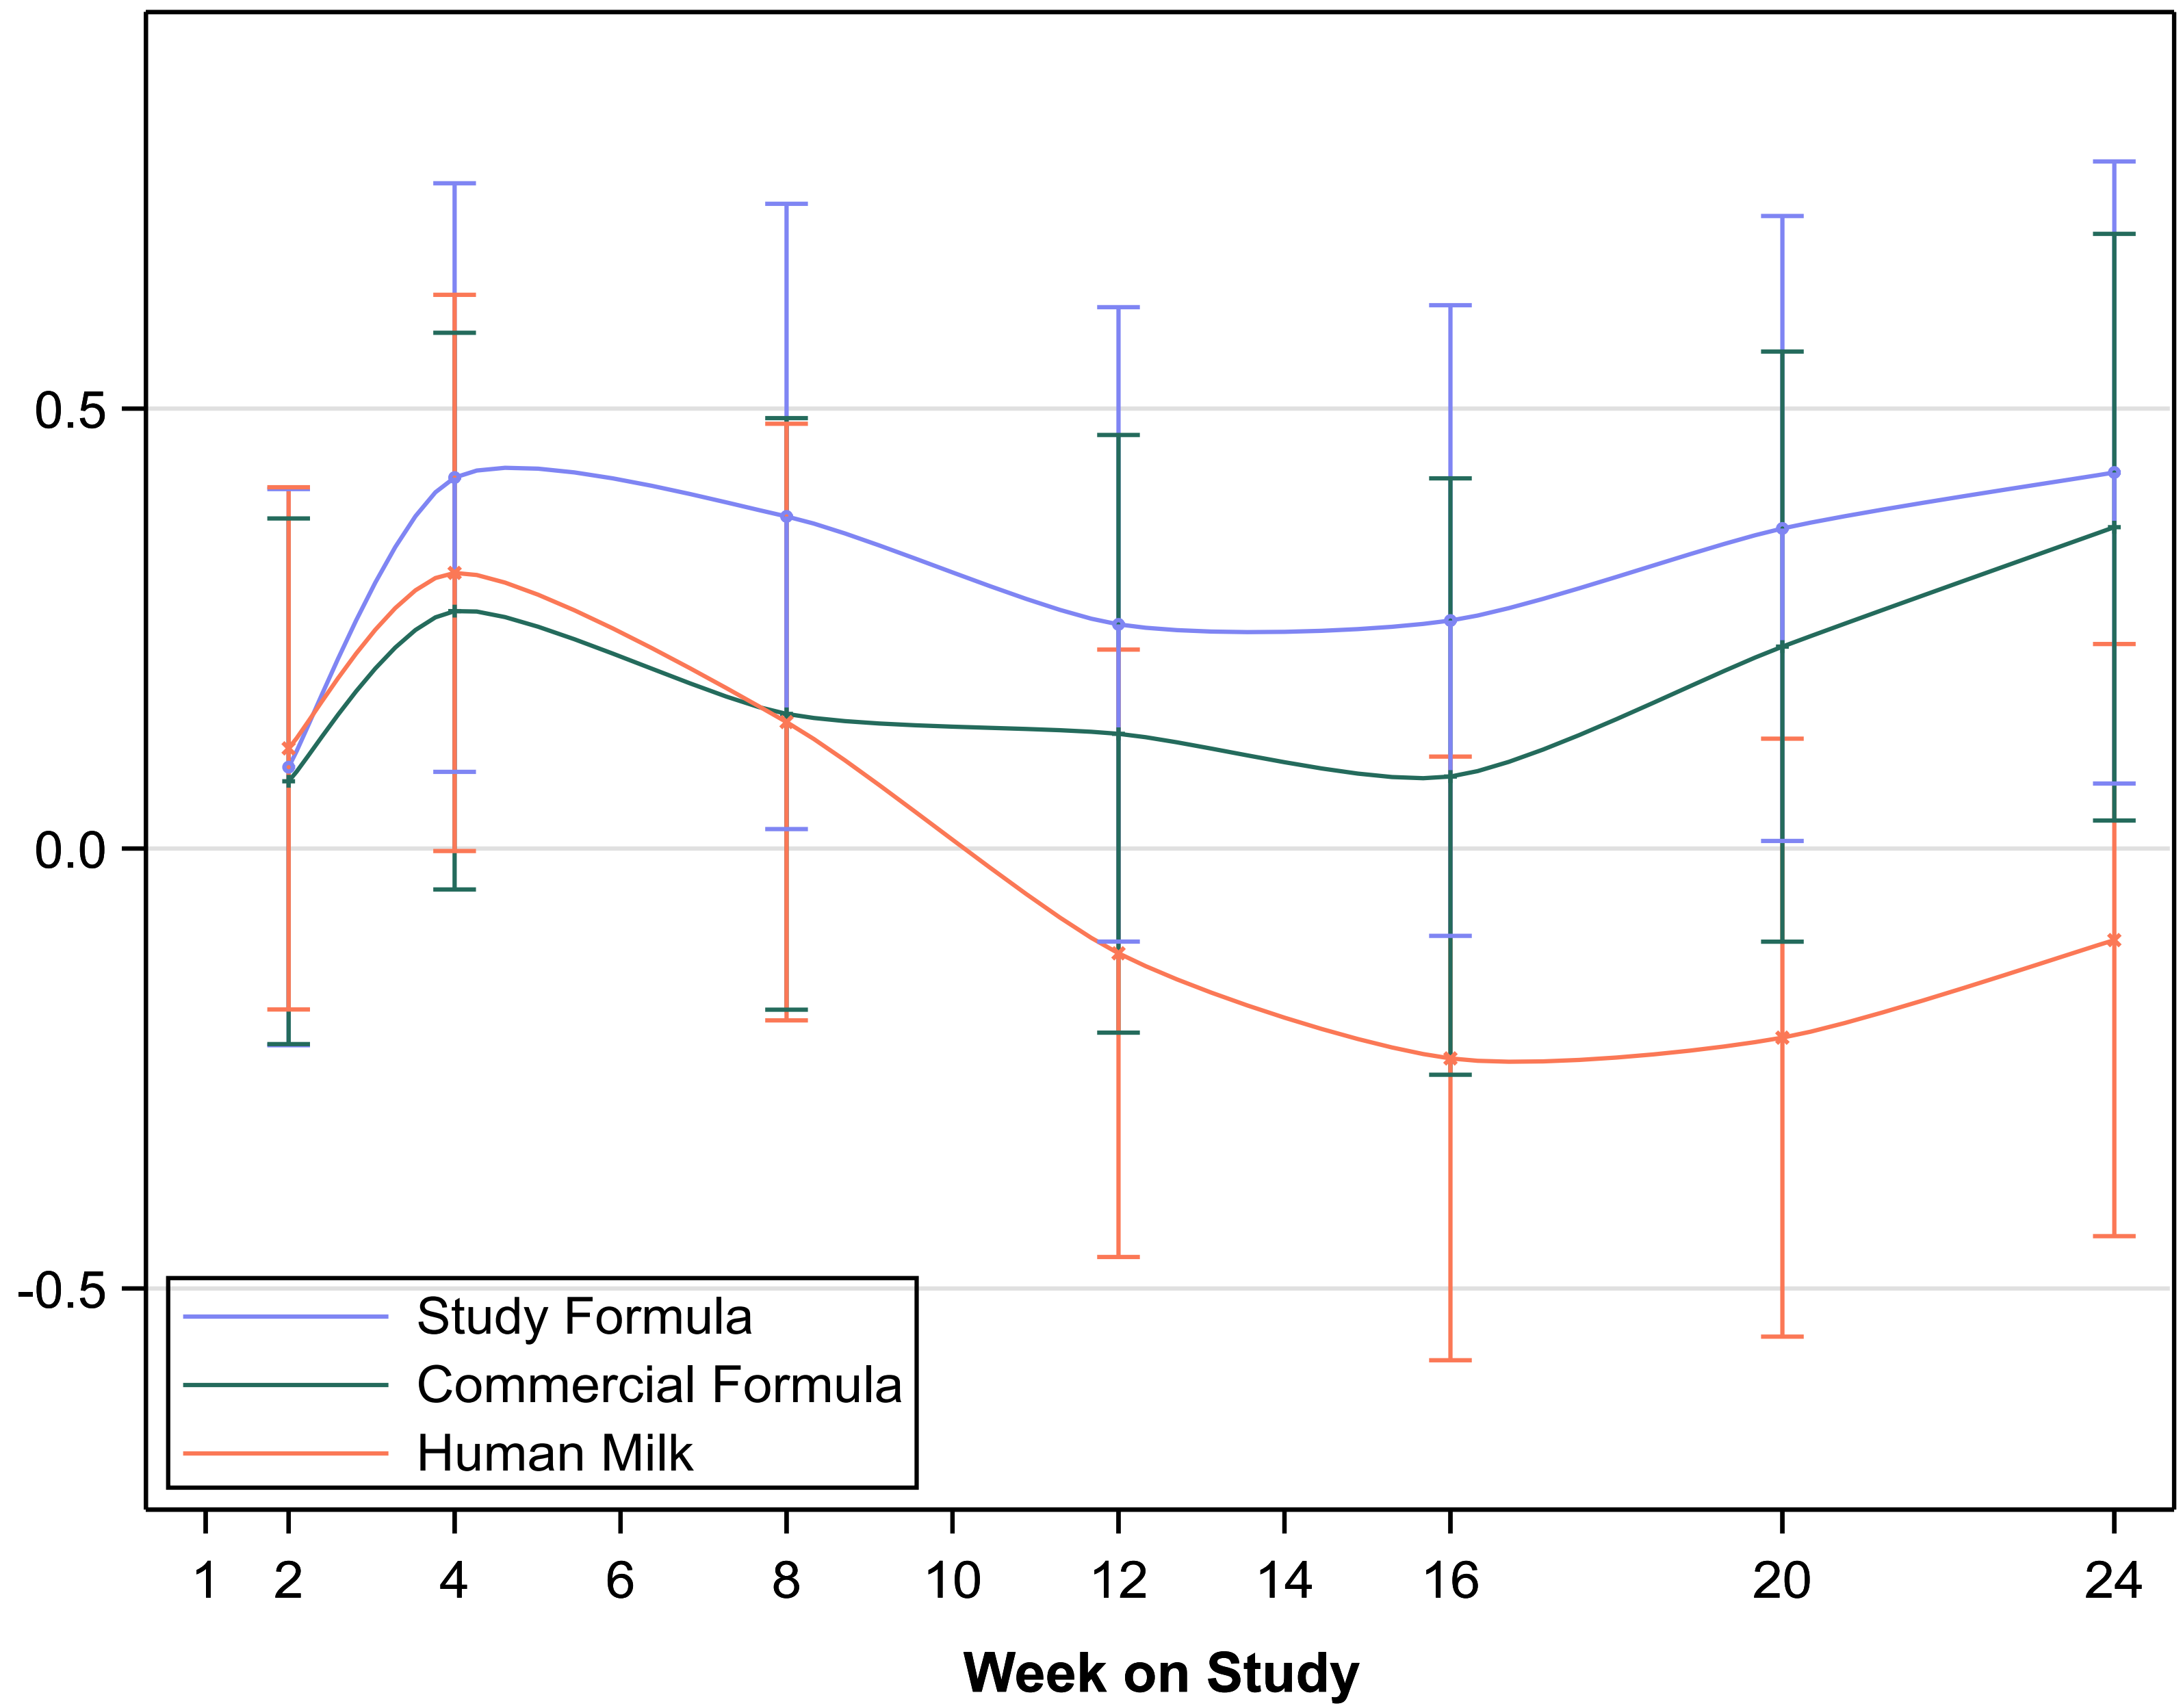

Supplemental Table 4. Adjusted Anthropometrics by Visit by Feeding Group in the PP Population

|                                   | <b>Study Formula</b><br>(n=61) | <b>Commercial Formula</b><br>(n=67) | <b>Human Milk</b><br>(n=57) |
|-----------------------------------|--------------------------------|-------------------------------------|-----------------------------|
| <b>Weight (kg)</b>                |                                |                                     |                             |
| Week 2                            | 4.1 (0.04)                     | 4.0 (0.04)                          | 4.1 (0.04)                  |
| Week 4                            | 4.7 (0.05)                     | 4.6 (0.05)                          | 4.6 (0.05) <sup>b</sup>     |
| Week 8                            | 5.6 (0.07)                     | 5.5 (0.06)                          | 5.4 (0.07) <sup>b</sup>     |
| Week 12                           | 6.3 (0.08)                     | 6.2 (0.08)                          | 6.0 (0.08) <sup>b</sup>     |
| Week 16                           | 7.0 (0.10)                     | 6.9 (0.09)                          | 6.5 (0.10) <sup>b</sup>     |
| Week 20                           | 7.6 (0.11)                     | 7.5 (0.10)                          | 7.0 (0.11) <sup>b</sup>     |
| Week 24                           | 8.1 (0.11)                     | 8.0 (0.10)                          | 7.4 (0.11) <sup>b</sup>     |
| <b>Weight-for-Age Z-Score</b>     |                                |                                     |                             |
| Week 2                            | 0.03 (0.07) <sup>a</sup>       | -0.14 (0.06)                        | -0.09 (0.06)                |
| Week 4                            | 0.09 (0.08) <sup>a</sup>       | -0.11 (0.07)                        | -0.14 (0.08) <sup>b</sup>   |
| Week 8                            | 0.11 (0.10)                    | -0.07 (0.09)                        | -0.26 (0.10) <sup>b</sup>   |
| Week 12                           | 0.13 (0.12)                    | 0.03 (0.11)                         | -0.33 (0.11) <sup>b</sup>   |
| Week 16                           | 0.30 (0.12)                    | 0.19 (0.11)                         | -0.33 (0.12) <sup>b</sup>   |
| Week 20                           | 0.44 (0.13)                    | 0.33 (0.12)                         | -0.30 (0.13) <sup>b</sup>   |
| Week 24                           | 0.55 (0.13)                    | 0.48 (0.12)                         | -0.26 (0.13) <sup>b</sup>   |
| <b>Weight Gain Velocity (g/d)</b> |                                |                                     |                             |
| Week 2                            | 43.3 (1.71) <sup>a</sup>       | 36.6 (1.61)                         | 40.1 (1.70)                 |
| Week 4                            | 41.8 (1.50) <sup>a</sup>       | 37.0 (1.41)                         | 38.0 (1.48)                 |
| Week 8                            | 36.7 (1.33)                    | 34.0 (1.26)                         | 33.2 (1.30)                 |
| Week 12                           | 32.6 (1.21)                    | 31.2 (1.14)                         | 29.4 (1.17) <sup>b</sup>    |
| Week 16                           | 30.3 (1.12)                    | 29.1 (1.06)                         | 26.6 (1.07) <sup>b</sup>    |
| Week 20                           | 28.5 (1.08)                    | 27.5 (1.02)                         | 24.8 (1.02) <sup>b</sup>    |
| Week 24                           | 26.5 (1.03)                    | 25.9 (0.97)                         | 23.0 (0.96) <sup>b</sup>    |
| <b>Length (cm)</b>                |                                |                                     |                             |
| Week 2                            | 52.8 (0.23)                    | 52.5 (0.21)                         | 52.8 (0.21)                 |
| Week 4                            | 54.6 (0.24)                    | 54.3 (0.23)                         | 54.4 (0.22)                 |
| Week 8                            | 57.8 (0.25)                    | 57.6 (0.23)                         | 57.4 (0.23)                 |
| Week 12                           | 60.6 (0.27)                    | 60.4 (0.25)                         | 60.2 (0.25)                 |
| Week 16                           | 63.4 (0.27)                    | 63.3 (0.25)                         | 62.7 (0.26) <sup>b</sup>    |
| Week 20                           | 65.3 (0.28)                    | 65.1 (0.27)                         | 64.3 (0.27) <sup>b</sup>    |
| Week 24                           | 67.4 (0.30)                    | 67.1 (0.28)                         | 65.9 (0.29) <sup>b</sup>    |
| <b>Length-for-Age Z-Score</b>     |                                |                                     |                             |
| Week 2                            | -0.26 (0.11)                   | -0.47 (0.11)                        | -0.33 (0.11)                |
| Week 4                            | -0.30 (0.12)                   | -0.47 (0.11)                        | -0.43 (0.11)                |
| Week 8                            | -0.24 (0.12)                   | -0.33 (0.12)                        | -0.43 (0.12)                |

|                                           |                          |              |                           |
|-------------------------------------------|--------------------------|--------------|---------------------------|
| Week 12                                   | -0.16 (0.13)             | -0.26 (0.12) | -0.34 (0.12)              |
| Week 16                                   | 0.08 (0.13)              | 0.02 (0.12)  | -0.23 (0.12) <sup>b</sup> |
| Week 20                                   | 0.19 (0.13)              | 0.09 (0.12)  | -0.22 (0.13) <sup>b</sup> |
| Week 24                                   | 0.35 (0.14)              | 0.23 (0.13)  | -0.28 (0.13) <sup>b</sup> |
| <b>Length Gain Velocity (mm/d)</b>        |                          |              |                           |
| Week 2                                    | 1.7 (0.10)               | 1.4 (0.09)   | 1.5 (0.10)                |
| Week 4                                    | 1.5 (0.06)               | 1.3 (0.06)   | 1.3 (0.06)                |
| Week 8                                    | 1.3 (0.04)               | 1.3 (0.04)   | 1.2 (0.04)                |
| Week 12                                   | 1.2 (0.03)               | 1.2 (0.03)   | 1.1 (0.03)                |
| Week 16                                   | 1.1 (0.03)               | 1.1 (0.02)   | 1.1 (0.02) <sup>b</sup>   |
| Week 20                                   | 1.1 (0.02)               | 1.0 (0.02)   | 1.0 (0.02) <sup>b</sup>   |
| Week 24                                   | 1.0 (0.02)               | 1.0 (0.02)   | 0.9 (0.02) <sup>b</sup>   |
| <b>Weight-for-Length Z-score</b>          |                          |              |                           |
| Week 2                                    | 0.09 (0.16)              | 0.08 (0.15)  | 0.11 (0.15)               |
| Week 4                                    | 0.42 (0.17)              | 0.27 (0.16)  | 0.31 (0.16)               |
| Week 8                                    | 0.38 (0.18)              | 0.15 (0.17)  | 0.14 (0.17)               |
| Week 12                                   | 0.25 (0.18)              | 0.13 (0.17)  | -0.12 (0.17)              |
| Week 16                                   | 0.26 (0.18)              | 0.08 (0.17)  | -0.24 (0.17) <sup>b</sup> |
| Week 20                                   | 0.36 (0.18)              | 0.23 (0.17)  | -0.21 (0.17) <sup>b</sup> |
| Week 24                                   | 0.43 (0.18)              | 0.37 (0.17)  | -0.10 (0.17) <sup>b</sup> |
| <b>Head circumference (cm)</b>            |                          |              |                           |
| Week 2                                    | 37.1 (0.12) <sup>a</sup> | 36.8 (0.11)  | 36.9 (0.11)               |
| Week 4                                    | 38.2 (0.13)              | 38.0 (0.12)  | 37.9 (0.12)               |
| Week 8                                    | 39.8 (0.13) <sup>a</sup> | 39.5 (0.13)  | 39.3 (0.13) <sup>b</sup>  |
| Week 12                                   | 41.0 (0.15)              | 40.8 (0.14)  | 40.5 (0.15) <sup>b</sup>  |
| Week 16                                   | 42.3 (0.15)              | 42.0 (0.14)  | 41.6 (0.14) <sup>b</sup>  |
| Week 20                                   | 43.2 (0.16)              | 42.9 (0.15)  | 42.4 (0.15) <sup>b</sup>  |
| Week 24                                   | 44.2 (0.16)              | 43.7 (0.16)  | 43.2 (0.16) <sup>b</sup>  |
| <b>Head circumference-for-Age Z-score</b> |                          |              |                           |
| Week 2                                    | 0.56 (0.09) <sup>a</sup> | 0.29 (0.09)  | 0.41 (0.09)               |
| Week 4                                    | 0.65 (0.11)              | 0.48 (0.10)  | 0.43 (0.10)               |
| Week 8                                    | 0.67 (0.11)              | 0.43 (0.11)  | 0.35 (0.11) <sup>b</sup>  |
| Week 12                                   | 0.71 (0.12)              | 0.50 (0.11)  | 0.35 (0.12) <sup>b</sup>  |
| Week 16                                   | 0.88 (0.12)              | 0.64 (0.11)  | 0.36 (0.11) <sup>b</sup>  |
| Week 20                                   | 1.02 (0.13)              | 0.75 (0.12)  | 0.42 (0.12) <sup>b</sup>  |
| Week 24                                   | 1.13 (0.13)              | 0.82 (0.12)  | 0.41 (0.13) <sup>b</sup>  |
| <b>Head circumference velocity (mm/d)</b> |                          |              |                           |
| Week 2                                    | 1.08 (0.05) <sup>a</sup> | 0.86 (0.05)  | 0.98 (0.05)               |
| Week 4                                    | 0.94 (0.03)              | 0.87 (0.03)  | 0.87 (0.04)               |
| Week 8                                    | 0.75 (0.02) <sup>a</sup> | 0.69 (0.02)  | 0.70 (0.02)               |
| Week 12                                   | 0.65 (0.02)              | 0.61 (0.02)  | 0.61 (0.02)               |
| Week 16                                   | 0.59 (0.01) <sup>a</sup> | 0.55 (0.01)  | 0.55 (0.01) <sup>b</sup>  |

|         |                          |             |                          |
|---------|--------------------------|-------------|--------------------------|
| Week 20 | 0.55 (0.01) <sup>a</sup> | 0.52 (0.01) | 0.51 (0.01) <sup>b</sup> |
| Week 24 | 0.51 (0.01) <sup>a</sup> | 0.48 (0.01) | 0.46 (0.01) <sup>b</sup> |

Model-based means (SE), Adjusted using previously described factors plus baseline value, maternal education, income level, and maternal pre-pregnancy BMI.

<sup>a</sup> Significant difference between SF and CF,  $p < 0.025$

<sup>b</sup> Significant difference between SF and HM,  $p < 0.025$

Supplemental Table 5. Serum Amino Acid Concentrations ( $\mu\text{mol/l}$ ) in a subgroup of the PP Population at Week 16 by Feeding Group

|               | <b>Study Formula</b><br>(n= 21) | <b>Commercial Formula</b><br>(n= 28) | <b>Human Milk</b><br>(n= 25) |
|---------------|---------------------------------|--------------------------------------|------------------------------|
| Alanine       | 512 (145)                       | 517 (118)                            | 569 (166)                    |
| Arginine      | 112 (23)                        | 127 (33)                             | 127 (22)                     |
| Aspartic Acid | 61 (30)                         | 54 (28)                              | 137 (70)                     |
| Asparagine    | 70 (16)                         | 64 (11)                              | 60 (18)                      |
| Cysteine      | 7 (8)                           | 5 (7)                                | 6.8 (5.4)                    |
| Glutamic Acid | 158 (71)                        | 140 (59)                             | 158 (63)                     |
| Glutamine     | 520 (137)                       | 543 (146)                            | 581 (113)                    |
| Glycine       | 369 (166)                       | 335 (128)                            | 473 (266)                    |
| Histidine     | 120 (43)                        | 104 (32)                             | 151 (72)                     |
| Isoleucine    | 105 (24)                        | 97 (20)                              | 89 (29)                      |
| Leucine       | 150 (29)                        | 152 (33)                             | 142 (42)                     |
| Lysine        | 211 (51)                        | 201 (44)                             | 191 (53)                     |
| Methionine    | 32 (8)                          | 33 (8)                               | 27 (7)                       |
| Phenylalanine | 76 (14)                         | 78 (18)                              | 75 (18)                      |
| Proline       | 207 (38)                        | 221 (61)                             | 252 (53)                     |
| Serine        | 423 (273)                       | 334 (212)                            | 617 (436)                    |
| Threonine     | 282 (88)                        | 234 (70)                             | 221 (83)                     |
| Tryptophan    | 96 (15)                         | 86 (17)                              | 78 (17)                      |
| Tyrosine      | 98 (22)                         | 49 (21)                              | 101 (28)                     |
| Valine        | 237 (33)                        | 243 (47)                             | 209 (58)                     |

Mean (SD)

Supplemental Table 6. Gastrointestinal Tolerance by Visit by Feeding Group in the PP population

|                                                                      | <b>Study Formula</b><br>(n=61) <sup>c</sup> | <b>Commercial Formula</b><br>(n=67) <sup>c</sup> | <b>Human Milk</b><br>(n=57) <sup>c</sup> |
|----------------------------------------------------------------------|---------------------------------------------|--------------------------------------------------|------------------------------------------|
| <b>Number of spit-ups per day, mean (SE)</b>                         |                                             |                                                  |                                          |
| Week 1                                                               | 2.2 (0.3)                                   | 2.1 (0.3)                                        | 2.3 (0.259)                              |
| Week 2                                                               | 2.3 (0.3)                                   | 3.0 (0.3)                                        | 3.1 (0.304)                              |
| Week 4                                                               | 2.5 (0.3)                                   | 2.9 (0.3)                                        | 3.6 (0.312) <sup>b</sup>                 |
| Week 6                                                               | 2.7 (0.3)                                   | 3.0 (0.3)                                        | 3.6 (0.319)                              |
| Week 8                                                               | 2.5 (0.3) <sup>a</sup>                      | 3.4 (0.3)                                        | 3.2 (0.322)                              |
| Week 10                                                              | 2.4 (0.3) <sup>a</sup>                      | 3.5 (0.3)                                        | 3.1 (0.306)                              |
| Week 12                                                              | 2.5 (0.3) <sup>a</sup>                      | 3.4 (0.3)                                        | 3.2 (0.309)                              |
| Week 14                                                              | 2.3 (0.3) <sup>a</sup>                      | 3.2 (0.3)                                        | 3.1 (0.303)                              |
| Week 16                                                              | 2.6 (0.3)                                   | 3.0 (0.3)                                        | 2.9 (0.302)                              |
| Week 20                                                              | 2.4 (0.3)                                   | 2.6 (0.3)                                        | 2.7 (0.322)                              |
| Week 24                                                              | 2.0 (0.3)                                   | 2.3 (0.3)                                        | 2.5 (0.299)                              |
| <b>Stool Consistency Score, mean (SE)</b>                            |                                             |                                                  |                                          |
| Week 1                                                               | 3.8 (0.1) <sup>a</sup>                      | 3.4 (0.1)                                        | 3.9 (0.1)                                |
| Week 2                                                               | 3.8 (0.1) <sup>a</sup>                      | 3.3 (0.1)                                        | 3.9 (0.1)                                |
| Week 4                                                               | 3.7 (0.1) <sup>a</sup>                      | 3.4 (0.1)                                        | 4.0 (0.1)                                |
| Week 6                                                               | 3.7 (0.1) <sup>a</sup>                      | 3.3 (0.1)                                        | 3.9 (0.1)                                |
| Week 8                                                               | 3.7 (0.1) <sup>a</sup>                      | 3.3 (0.1)                                        | 3.9 (0.1)                                |
| Week 10                                                              | 3.7 (0.1) <sup>a</sup>                      | 3.2 (0.1)                                        | 3.8 (0.1)                                |
| Week 12                                                              | 3.8 (0.1) <sup>a</sup>                      | 3.3 (0.1)                                        | 3.8 (0.1)                                |
| Week 14                                                              | 3.6 (0.1) <sup>a</sup>                      | 3.2 (0.1)                                        | 3.9 (0.1)                                |
| Week 16                                                              | 3.6 (0.1) <sup>a</sup>                      | 3.3 (0.1)                                        | 3.9 (0.1) <sup>b</sup>                   |
| Week 20                                                              | 3.4 (0.1) <sup>a</sup>                      | 3.1 (0.1)                                        | 3.8 (0.1) <sup>b</sup>                   |
| Week 24                                                              | 3.3 (0.1)                                   | 3.1 (0.1)                                        | 3.5 (0.1)                                |
| <b>Number of stools per day, mean (SE)</b>                           |                                             |                                                  |                                          |
| Week 1                                                               | 2.8 (0.2)                                   | 2.7 (0.2)                                        | 5.7 (0.3) <sup>b</sup>                   |
| Week 2                                                               | 2.9 (0.3)                                   | 2.5 (0.2)                                        | 5.7 (0.3) <sup>b</sup>                   |
| Week 4                                                               | 2.5 (0.3)                                   | 2.4 (0.2)                                        | 4.7 (0.3) <sup>b</sup>                   |
| Week 6                                                               | 2.2 (0.2)                                   | 2.1 (0.2)                                        | 3.7 (0.2) <sup>b</sup>                   |
| Week 8                                                               | 2.2 (0.3)                                   | 2.2 (0.3)                                        | 3.0 (0.3) <sup>b</sup>                   |
| Week 10                                                              | 2.0 (0.2)                                   | 2.1 (0.2)                                        | 2.8 (0.2) <sup>b</sup>                   |
| Week 12                                                              | 2.1 (0.2)                                   | 2.2 (0.2)                                        | 2.3 (0.2)                                |
| Week 14                                                              | 2.1 (0.2)                                   | 2.0 (0.2)                                        | 1.9 (0.2)                                |
| Week 16                                                              | 2.0 (0.2)                                   | 1.6 (0.2)                                        | 1.3 (0.2) <sup>b</sup>                   |
| Week 20                                                              | 1.8 (0.2)                                   | 2.0 (0.2)                                        | 1.3 (0.2)                                |
| Week 24                                                              | 1.7 (0.2)                                   | 1.8 (0.27)                                       | 1.2 (0.2)                                |
| <b>Proportion of infants with moderate or excessive gassiness, %</b> |                                             |                                                  |                                          |
| Week 1                                                               | 50.8                                        | 47.7                                             | 34.6                                     |
| Week 2                                                               | 60.7                                        | 71.6                                             | 62.5                                     |

|         |      |      |      |
|---------|------|------|------|
| Week 4  | 73.3 | 74.2 | 75.0 |
| Week 6  | 67.2 | 73.1 | 73.7 |
| Week 8  | 63.3 | 78.5 | 60.7 |
| Week 10 | 54.2 | 69.2 | 54.4 |
| Week 12 | 57.6 | 65.2 | 50.9 |
| Week 14 | 50.8 | 54.5 | 47.4 |
| Week 16 | 54.7 | 67.6 | 50.0 |
| Week 20 | 50.8 | 47.8 | 42.1 |
| Week 24 | 52.5 | 47.6 | 26.3 |

<sup>a</sup> Significant difference between SF and CF,  $p < 0.025$

<sup>b</sup> Significant difference between SF and HM,  $p < 0.025$

<sup>c</sup> Number of participants for each group at each timepoint was variable between 52-71

Supplemental Table 7: Adverse Events by Feeding Group by Body System or Organ Class in the PP Population

|                                                                     | <b>Study<br/>Formula</b><br>(n=61) | <b>Commercial<br/>Formula</b><br>(n=67) | <b>Human Milk</b><br>(n=57) |
|---------------------------------------------------------------------|------------------------------------|-----------------------------------------|-----------------------------|
| Gastrointestinal disorders                                          | 28 (45.9)                          | 28 (41.8)                               | 24 (42.1)                   |
| Infections and infestations                                         | 21 (34.4)                          | 18 (26.9)                               | 32 (56.1)                   |
| Skin and subcutaneous tissue disorders                              | 27 (44.3)                          | 22 (32.8)                               | 20 (35.1)                   |
| Respiratory, thoracic and mediastinal disorders                     | 13 (21.3)                          | 15 (22.4)                               | 9 (15.8)                    |
| Congenital, familial and genetic disorders                          | 10 (16.4)                          | 5 (7.5)                                 | 11 (19.3)                   |
| Pregnancy, puerperium and perinatal conditions                      | 7 (11.5)                           | 8 (11.9)                                | 6 (10.5)                    |
| Injury, poisoning and procedural complications                      | 8 (13.1)                           | 6 (9.0)                                 | 5 (8.8)                     |
| General disorders and administration site conditions                | 2 (3.3)                            | 6 (9.0)                                 | 6 (10.5)                    |
| Musculoskeletal and connective tissue disorders                     | 2 (3.3)                            | 3 (4.5)                                 | 4 (7.0)                     |
| Neoplasms benign, malignant and unspecified (incl cysts and polyps) | 2 (3.3)                            | 2 (3.0)                                 | 2 (3.5)                     |
| Metabolism and nutrition disorders                                  | 1 (1.6)                            | 2 (3.0)                                 | 1 (1.8)                     |
| Investigations                                                      | 2 (3.3)                            | 1 (1.5)                                 | 0 (0)                       |
| Reproductive system and breast disorders                            | 0 (0)                              | 1 (1.5)                                 | 1 (1.8)                     |
| Cardiac disorders                                                   | 0 (0)                              | 0 (0)                                   | 1 (1.8)                     |
| Endocrine disorders                                                 | 1 (1.6)                            | 0 (0)                                   | 0 (0)                       |
| Eye disorders                                                       | 0 (0)                              | 1 (1.5)                                 | 0 (0)                       |
| Immune system disorders                                             | 1 (1.6)                            | 0 (0)                                   | 0 (0)                       |
| Number (%)                                                          |                                    |                                         |                             |



Supplemental Table 8: Occurrence of Possibly Related Adverse Event for Each System Organ Class and Use of Concomitant Medications of the Alimentary Tract and Metabolism by Feeding Group in the PP Population

|                                                                                | <b>Study Formula</b><br>(n=61) | <b>Commercial Formula</b><br>(n=67) | <b>Human Milk</b><br>(n= 57) |
|--------------------------------------------------------------------------------|--------------------------------|-------------------------------------|------------------------------|
| <b>Possibly Related Adverse Events</b>                                         |                                |                                     |                              |
| Gastrointestinal disorders <sup>b</sup>                                        | 8 (13.1)                       | 6 (9.0)                             | 1 (1.8)                      |
| Skin and subcutaneous tissue disorders <sup>c</sup>                            | 2 (3.3)                        | 5 (7.5)                             | 1 (1.8)                      |
| Pregnancy, puerperium and perinatal conditions <sup>d</sup>                    | 2 (3.3)                        | 3 (4.5)                             | 0 (0)                        |
| <b>Concomitant Medications</b>                                                 |                                |                                     |                              |
| Drugs for all gastrointestinal and metabolism conditions                       | 22 (36.1)                      | 28 (41.8)                           | 34 (59.6)                    |
| Drugs for functional gastrointestinal disorders <sup>e</sup>                   | 13 (21.3)                      | 18 (26.9)                           | 12 (21.1)                    |
| Drugs for peptic ulcer and gastroesophageal reflux disease (GERD) <sup>f</sup> | 4 (6.6)                        | 9 (13.4)                            | 4 (7.0)                      |
| Drugs for constipation <sup>g</sup>                                            | 2 (3.3)                        | 2 (3.0)                             | 2 (3.5)                      |

Number (%)

<sup>a</sup>Includes all AEs designated by study investigators as “Possibly”, “Probably”, and “Definitely” related to study formula/human milk intake

<sup>b</sup>Gastrointestinal Disorders includes: Flatulence, Infantile spitting up, Diarrhoea, Gastroesophageal reflux disease, Abdominal distension, Constipation

<sup>c</sup>Skin and subcutaneous tissue disorders includes: Dermatitis atopic, Seborrhoeic dermatitis

<sup>d</sup>Pregnancy, puerperium and perinatal conditions includes: Neonatal disorder

<sup>e</sup> Simethicone, Gripe water

<sup>f</sup> Famotidine, Ranitidine

<sup>g</sup> Glycerol, Polyethylene glycol, Fructooligosaccharides, Magnesium hydroxide, Prune juice
